# Supplementary material
Source: Springer Nature journal article supplement (https://www.springermedizin.de/resource/supplementary/12961_2014_350_MOESM1_ESM.pdf/9571118)
Supplement: MOESM1 [file 9571118]

**Table S1 Topic guide used for semi-structured interviews**

|                               |                                                                                                                                                                                                                                                                                                                                       |
|-------------------------------|---------------------------------------------------------------------------------------------------------------------------------------------------------------------------------------------------------------------------------------------------------------------------------------------------------------------------------------|
| <b>PARTICIPANT &amp; EAG</b>  | <p>Your position now &amp; then</p> <p>How did you get involved</p> <p>Who decided EAGs &amp; why?</p> <p>What led up to EAGs? Why now?</p> <p>Why diabetes?</p> <p>What were there particular challenges in diabetes care at the time?</p>                                                                                           |
| <b>MEMEBERSHIP</b>            | <p>Other members selected</p> <p>Remit for group</p> <p>Your role within group (did it change)</p> <p>Your objectives/priorities</p> <p>Your expectations for the group</p>                                                                                                                                                           |
| <b>DEVELOPING POLICY</b>      | <p>Objectives from the outset...</p> <p>How were priorities identified</p> <ul style="list-style-type: none"> <li>- who brought them to table</li> </ul> <p>What issues were to the forefront, most occupied with?</p> <ul style="list-style-type: none"> <li>- How recommendations developed</li> </ul>                              |
| <b>ALTERNATIVES</b>           | <p>Alternative solutions discussed</p> <ul style="list-style-type: none"> <li>- sharing ideas</li> </ul> <p>How were alternatives evaluated</p> <p>Why disregard them</p> <p>Topics of confusion or disagreement</p> <p>How were differences of opinion handled? (consensus)</p> <p>Was there bargaining involved? In what way...</p> |
| <b>CONTENT<br/>+ EVIDENCE</b> | <p>Existing/ available evidence</p> <p>Efforts to produce/gather evidence</p> <p>Types of evidence drawn on: expertise, international, research</p> <p>How did presentations inform report? Was information used?</p>                                                                                                                 |
| <b>SUB-GROUP</b>              | <p>Why that subgroup/topic</p> <p>(Integrated care, how was that model developed?)</p> <p>Bringing ideas to the larger group for discussion/agreement?</p>                                                                                                                                                                            |
| <b>FINALISING REPORT</b>      | <p>Any crisis points in the process?</p> <p>How did the approval process work with the HSE?</p> <ul style="list-style-type: none"> <li>- Timeline, stakeholders, decisions, progress, outcomes</li> </ul>                                                                                                                             |
| <b>RELATIONSHIPS</b>          | <p>Group dynamic- influence, leadership, partnership, networks</p> <p>Resistance, enabling factors</p> <p>People resisting/enabling</p> <p>Other Barriers &amp; Facilitators</p>                                                                                                                                                      |

---

**CONTEXT**

Key milestones/crises in diabetes  
Previous efforts – was this process different,  
advantages/disadvantages of this attempt  
Influence of other policies, changes in HSE...  
Financial implications/ Economic situation  
Current resources: staff, skills, organization.  
Media Role? Role of advocacy groups?

**IMPLEMENTATION**

What was the expectation once recommendations were agreed?  
Reaction of diabetes community: widely accepted?  
Critical factors for implementation

Should the content differ?  
What could have been done differently  
Balance of goals & priorities  
Use of EAGs for policy making

---
